# Supplementary material
Source: Springer Nature journal article supplement (https://www.springermedizin.de/resource/supplementary/12889_2009_2019_MOESM4_ESM.pdf/9484318)
Supplement: MOESM4 [file 9484318]

Your risk of having a heart attack or stroke within the next 5 years

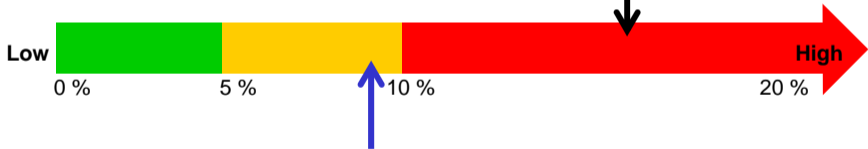

Your risk if you were a non-smoker
